# Supplementary material
Source: PubMed Central journal article supplement (PMC1564090)
Supplement: rspb20042993s04.pdf [file rspb20042993s04.pdf]

# ELECTRONIC APPENDIX

This is the Electronic Appendix to the article

**Scaling of mammalian ethmoid bones can predict  
olfactory organ size and performance**

by

Henry Pihlström, Mikael Fortelius, Simo Hemilä, Roger Forsman  
and Tom Reuter

*Proc. R. Soc. B* ([doi:10.1098/rspb.2004.2993](https://doi.org/10.1098/rspb.2004.2993))

Electronic appendices are refereed with the text; however, no attempt is made  
to impose a uniform editorial style on the electronic appendices.

## Appendix A

|                                   | location of specimen | catalogue number | skull area (mm <sup>2</sup> ) | log skull area (mm <sup>2</sup> ) | ethmoid area (mm <sup>2</sup> ) | log ethmoid area (mm <sup>2</sup> ) |
|-----------------------------------|----------------------|------------------|-------------------------------|-----------------------------------|---------------------------------|-------------------------------------|
| <b>MONOTREMATA</b>                |                      |                  |                               |                                   |                                 |                                     |
| <b>Tachyglossidae</b>             |                      |                  |                               |                                   |                                 |                                     |
| <i>Tachyglossus aculeatus</i>     | FMNH                 | 562/1960         | 4302                          | 3,634                             | 98                              | 1,991                               |
| <b>DIDELPHIMORPHIA</b>            |                      |                  |                               |                                   |                                 |                                     |
| <b>Didelphidae</b>                |                      |                  |                               |                                   |                                 |                                     |
| <i>Didelphis virginiana</i>       | FMNH                 | 1.802            | 3244                          | 3,511                             | 122                             | 2,086                               |
| <b>DASYUROMORPHIA</b>             |                      |                  |                               |                                   |                                 |                                     |
| <b>Dasyuridae</b>                 |                      |                  |                               |                                   |                                 |                                     |
| <i>Phascogale tapoatafa</i>       | FMNH                 | 776/1960         | 1188                          | 3,075                             | 29                              | 1,462                               |
| <b>DIPROTODONTIA</b>              |                      |                  |                               |                                   |                                 |                                     |
| <b>Petauridae</b>                 |                      |                  |                               |                                   |                                 |                                     |
| <i>Petauroides volans</i>         | FMNH                 | 95               | 1960                          | 3,292                             | 36                              | 1,556                               |
| <b>Phascolarctidae</b>            |                      |                  |                               |                                   |                                 |                                     |
| <i>Phascolarctos cinereus</i>     | FMNH                 | 843/1960         | 8118                          | 3,909                             | 100                             | 2,000                               |
| <b>Macropodidae</b>               |                      |                  |                               |                                   |                                 |                                     |
| <i>Wallabia bicolor</i>           | MF                   | 22a MF           | 4670                          | 3,669                             | 153                             | 2,185                               |
| <i>Macropus rufogriseus</i>       | FMNH                 | 1.978            | 6011                          | 3,779                             | 171                             | 2,233                               |
| <i>Macropus rufogriseus</i>       | FMNH                 | 1.764/1.763      | 6283                          | 3,798                             | 203                             | 2,307                               |
| <i>Macropus rufogriseus</i>       | FMNH                 | 1.462            | 7050                          | 3,848                             | 196                             | 2,292                               |
| <i>Macropus rufogriseus</i>       |                      | average          | 6448                          | 3,809                             | 190                             | 2,279                               |
| <i>Macropus giganteus</i>         | MF                   | 21a MF           | 7531                          | 3,877                             | 196                             | 2,292                               |
| <b>XENARTHRA</b>                  |                      |                  |                               |                                   |                                 |                                     |
| <b>Megalonychidae</b>             |                      |                  |                               |                                   |                                 |                                     |
| <i>Choloepus didactylus</i>       | FMNH                 | 397              | 3435                          | 3,536                             | 298                             | 2,474                               |
| <b>Myrmecophagidae</b>            |                      |                  |                               |                                   |                                 |                                     |
| <i>Myrmecophaga tridactyla</i>    | SMNH                 | A591139          | 20687                         | 4,316                             | 900                             | 2,954                               |
| <i>Cyclopes didactylus</i>        | FMNH                 | 790/1960         | 803                           | 2,905                             | 28,2                            | 1,450                               |
| <b>Dasypodidae</b>                |                      |                  |                               |                                   |                                 |                                     |
| <i>Zaedyus pichiy</i>             | FMNH                 | 104              | 2460                          | 3,391                             | 193                             | 2,286                               |
| <i>Dasypus novemcinctus</i>       | FMNH                 | 161/1976         | 2417                          | 3,383                             | 334                             | 2,524                               |
| <b>INSECTIVORA</b>                |                      |                  |                               |                                   |                                 |                                     |
| <b>Erinaceidae</b>                |                      |                  |                               |                                   |                                 |                                     |
| <i>Erinaceus concolor</i>         | FMNH                 | 6525             | 1749                          | 3,243                             | 114                             | 2,057                               |
| <i>Erinaceus europaeus</i>        | FMNH                 | 5668             | 1496                          | 3,175                             | 105                             | 2,021                               |
| <i>Erinaceus europaeus</i>        | FMNH                 | 38.799           | 1666                          | 3,222                             | 105                             | 2,021                               |
| <i>Erinaceus europaeus</i>        | FMNH                 | 38.807           | 1413                          | 3,150                             | 98                              | 1,991                               |
| <i>Erinaceus europaeus</i>        | FMNH                 | 5674             | 1224                          | 3,088                             | 78                              | 1,892                               |
| <i>Erinaceus europaeus</i>        | FMNH                 | 5667             | 1491                          | 3,173                             | 96                              | 1,982                               |
| <i>Erinaceus europaeus</i>        | FMNH                 | 38.876           | 1544                          | 3,189                             | 97                              | 1,987                               |
| <i>Erinaceus europaeus</i>        | FMNH                 | 38.721           | 1266                          | 3,102                             | 85                              | 1,929                               |
| <i>Erinaceus europaeus</i>        | FMNH                 | 5682             | 1349                          | 3,130                             | 81                              | 1,908                               |
| <i>Erinaceus europaeus</i>        | FMNH                 | 39.422           | 1612                          | 3,207                             | 118                             | 2,072                               |
| <i>Erinaceus europaeus</i>        | FMNH                 | 33.117           | 1505                          | 3,178                             | 85                              | 1,929                               |
| <i>Erinaceus europaeus</i>        | FMNH                 | 38.802           | 1312                          | 3,118                             | 88                              | 1,944                               |
| <i>Erinaceus europaeus</i>        |                      | average          | 1444                          | 3,160                             | 94,2                            | 1,974                               |
| <b>Tenrecidae</b>                 |                      |                  |                               |                                   |                                 |                                     |
| <i>Micropotamogale ruwenzorii</i> | FMNH                 | 774/1960         | 1125                          | 3,051                             | 58                              | 1,763                               |

|                                  |      |                |             |              |             |              |
|----------------------------------|------|----------------|-------------|--------------|-------------|--------------|
| <b>Soricidae</b>                 |      |                |             |              |             |              |
| <i>Sorex araneus</i>             | FMNH | 36.115         | 186         | 2,270        | 12,5        | 1,097        |
| <i>Neomys fodiens</i>            | FMNH | 35.492         | 236         | 2,373        | 12,1        | 1,083        |
| <b>Talpidae</b>                  |      |                |             |              |             |              |
| <i>Talpa europaea</i>            | FMNH | 21.746         | 468         | 2,670        | 30          | 1,477        |
| <i>Talpa europaea</i>            | FMNH | 33.874         | 519         | 2,715        | 27          | 1,431        |
| <b><i>Talpa europaea</i></b>     |      | <b>average</b> | <b>494</b>  | <b>2,694</b> | <b>28,5</b> | <b>1,455</b> |
| <i>Scalopus aquaticus</i>        | FMNH | 1.489          | 635         | 2,803        | 25          | 1,398        |
| <i>Scalopus aquaticus</i>        | FMNH | 1.488          | 579         | 2,763        | 30          | 1,477        |
| <b><i>Scalopus aquaticus</i></b> |      | <b>average</b> | <b>607</b>  | <b>2,783</b> | <b>27,5</b> | <b>1,439</b> |
| <b>CHIROPTERA</b>                |      |                |             |              |             |              |
| <b>Pteropodidae</b>              |      |                |             |              |             |              |
| <i>Pteropus poliocephalus</i>    | FMNH | 136            | 1721        | 3,236        | 43          | 1,633        |
| <b>Phyllostomidae</b>            |      |                |             |              |             |              |
| <i>Desmodus rotundus</i>         | FMNH | 838            | 277         | 2,442        | 14,9        | 1,173        |
| <i>Phyllostomus discolor</i>     | FMNH | 820            | 438         | 2,641        | 12,2        | 1,086        |
| <i>Glossophaga soricina</i>      | FMNH | 825            | 175         | 2,243        | 7,8         | 0,892        |
| <i>Glossophaga longirostris</i>  | FMNH | 826            | 209         | 2,320        | 7,8         | 0,892        |
| <i>Carollia perspicillata</i>    | FMNH | 823            | 245         | 2,389        | 13,3        | 1,124        |
| <i>Sturnira ludovici</i>         | FMNH | 839            | 293         | 2,467        | 20          | 1,301        |
| <i>Uroderma magnirostrum</i>     | FMNH | 829            | 247         | 2,393        | 12,4        | 1,093        |
| <i>Artibeus jamaicensis</i>      | FMNH | 818            | 367         | 2,565        | 17,3        | 1,238        |
| <b>Vespertilionidae</b>          |      |                |             |              |             |              |
| <i>Myotis myotis</i>             | FMNH | 728            | 263         | 2,420        | 8,2         | 0,914        |
| <i>Myotis blythii</i>            | FMNH | 1321           | 225         | 2,352        | 7           | 0,845        |
| <i>Myotis daubentoni</i>         | FMNH | 5407           | 119         | 2,076        | 4,6         | 0,663        |
| <i>Nyctalus noctula</i>          | FMNH | 1609           | 220         | 2,342        | 7,4         | 0,869        |
| <i>Eptesicus nilssoni</i>        | FMNH | 5453           | 124         | 2,093        | 7,1         | 0,851        |
| <i>Eptesicus nilssoni</i>        | FMNH | 5925           | 129         | 2,111        | 4,9         | 0,690        |
| <b><i>Eptesicus nilssoni</i></b> |      | <b>average</b> | <b>127</b>  | <b>2,104</b> | <b>6</b>    | <b>0,778</b> |
| <i>Plecotus auritus</i>          | FMNH | 2              | 152         | 2,182        | 5,9         | 0,771        |
| <i>Miniopterus schreibersi</i>   | FMNH | 1.223          | 140         | 2,146        | 6,5         | 0,813        |
| <b>Molossidae</b>                |      |                |             |              |             |              |
| <i>Molossus molossus</i>         | FMNH | 830            | 166         | 2,220        | 6,6         | 0,820        |
| <b>PRIMATES</b>                  |      |                |             |              |             |              |
| <b>Lorisidae</b>                 |      |                |             |              |             |              |
| <i>Perodicticus potto</i>        | FMNH | 1.563          | 2030        | 3,307        | 45          | 1,653        |
| <i>Perodicticus potto</i>        | FMNH | 1.564          | 2031        | 3,308        | 38          | 1,580        |
| <b><i>Perodicticus potto</i></b> |      | <b>average</b> | <b>2031</b> | <b>3,308</b> | <b>41,5</b> | <b>1,618</b> |
| <b>Cheirogaleidae</b>            |      |                |             |              |             |              |
| <i>Cheirogaleus major</i>        | FMNH | 784/1960       | 734         | 2,866        | 17,6        | 1,246        |
| <i>Phaner furcifer</i>           | FMNH | 815/1960       | 1252        | 3,098        | 23,7        | 1,375        |
| <b>Lemuridae</b>                 |      |                |             |              |             |              |
| <i>Varecia variegata</i>         | FMNH | 39/1960        | 3418        | 3,534        | 59          | 1,771        |
| <i>Eulemur macaco</i>            | FMNH | 785/1960       | 3290        | 3,517        | 78          | 1,892        |
| <b>Indriidae</b>                 |      |                |             |              |             |              |
| <i>Avahi laniger</i>             | FMNH | 844/1960       | 1430        | 3,155        | 36          | 1,556        |
| <b>Cebidae</b>                   |      |                |             |              |             |              |
| <i>Brachyteles arachnoides</i>   | FMNH | 30/1960        | 5270        | 3,722        | 24,3        | 1,386        |
| <i>Cebus apella</i>              | FMNH | 19.95          | 4068        | 3,609        | 14,5        | 1,161        |
| <b>Callitrichidae</b>            |      |                |             |              |             |              |

|                                 |      |                |              |              |            |              |
|---------------------------------|------|----------------|--------------|--------------|------------|--------------|
| <i>Saguinus midas</i>           | FMNH | 840/1960       | 1090         | 3,037        | 1,94       | 0,288        |
| <b>Cercopithecidae</b>          |      |                |              |              |            |              |
| <i>Cercopithecus mitis</i>      | FMNH | 43/1960        | 4231         | 3,626        | 16,1       | 1,207        |
| <i>Cercopithecus diana</i>      | FMNH | 19.97          | 5330         | 3,727        | 20,6       | 1,314        |
| <i>Macaca sylvanus</i>          | FMNH | 861/1960       | 7499         | 3,875        | 27,2       | 1,435        |
| <i>Colobus guereza</i>          | FMNH | 221/1960       | 7132         | 3,853        | 11         | 1,041        |
| <b>Hominidae</b>                |      |                |              |              |            |              |
| <i>Pongo pygmaeus</i>           | FMNH | 509/1960       | 30149        | 4,479        | 75         | 1,875        |
| <i>Gorilla gorilla</i>          | FMNH | 1.416          | 25946        | 4,414        | 135        | 2,130        |
| <i>Homo sapiens</i>             | AUHU | I              | 17302        | 4,238        | 152        | 2,182        |
| <i>Homo sapiens</i>             | AUHU | II             | 17565        | 4,245        | 136        | 2,134        |
| <i>Homo sapiens</i>             | FMNH | 47             | 17988        | 4,255        | 127        | 2,104        |
| <i>Homo sapiens</i>             | FMNH | 6              | 15218        | 4,182        | 113        | 2,053        |
| <b>Homo sapiens</b>             |      | <b>average</b> | <b>17018</b> | <b>4,231</b> | <b>132</b> | <b>2,121</b> |
| <b>CARNIVORA</b>                |      |                |              |              |            |              |
| <b>Canidae</b>                  |      |                |              |              |            |              |
| <i>Vulpes vulpes</i>            | FMNH | 39.675         | 6319         | 3,801        | 435        | 2,638        |
| <i>Vulpes vulpes</i>            | FMNH | 6366           | 7131         | 3,804        | 558        | 2,747        |
| <i>Vulpes vulpes</i>            | FMNH | 5710           | 7603         | 3,881        | 445        | 2,648        |
| <i>Vulpes vulpes</i>            | HP   | HP             | 6669         | 3,824        | 607        | 2,783        |
| <b>Vulpes vulpes</b>            |      | <b>average</b> | <b>6931</b>  | <b>3,841</b> | <b>511</b> | <b>2,708</b> |
| <i>Urocyon cinereoargenteus</i> | FMNH | 1.494          | 5025         | 3,701        | 193        | 2,286        |
| <i>Urocyon cinereoargenteus</i> | FMNH | 1.493          | 5061         | 3,704        | 224        | 2,350        |
| <i>Urocyon cinereoargenteus</i> | FMNH | 1.800          | 5187         | 3,715        | 218        | 2,338        |
| <i>Urocyon cinereoargenteus</i> | FMNH | 1.801          | 4603         | 3,663        | 191        | 2,281        |
| <b>Urocyon cinereoargenteus</b> |      | <b>average</b> | <b>4969</b>  | <b>3,696</b> | <b>207</b> | <b>2,316</b> |
| <i>Canis latrans</i>            | FMNH | 1.796          | 12160        | 4,085        | 570        | 2,756        |
| <i>Canis lupus</i>              | FMNH | 39.569         | 16787        | 4,225        | 588        | 2,769        |
| <i>Canis lupus</i>              | FMNH | 34.651         | 19911        | 4,299        | 692        | 2,840        |
| <b>Canis lupus</b>              |      | <b>average</b> | <b>18349</b> | <b>4,264</b> | <b>640</b> | <b>2,806</b> |
| <i>Canis familiaris</i>         | FMNH | 260/1960       | 14055        | 4,148        | 578        | 2,762        |
| <i>Lycaon pictus</i>            | FMNH | 1.103          | 15126        | 4,180        | 604        | 2,781        |
| <b>Ursidae</b>                  |      |                |              |              |            |              |
| <i>Ursus arctos</i>             | FMNH | op.kok.        | 39426        | 4,596        | 1004       | 3,002        |
| <b>Procyonidae</b>              |      |                |              |              |            |              |
| <i>Ailurus fulgens</i>          | FMNH | 1.940          | 4875         | 3,688        | 194        | 2,288        |
| <i>Ailurus fulgens</i>          | FMNH | 1.537          | 5721         | 3,757        | 154        | 2,188        |
| <i>Ailurus fulgens</i>          | FMNH | 1.813          | 5358         | 3,729        | 158        | 2,199        |
| <b>Ailurus fulgens</b>          |      | <b>average</b> | <b>5318</b>  | <b>3,726</b> | <b>169</b> | <b>2,228</b> |
| <i>Bassariscus astutus</i>      | FMNH | 1.625          | 2753         | 3,440        | 133        | 2,124        |
| <i>Procyon lotor</i>            | FMNH | 996/1962       | 6937         | 3,841        | 219        | 2,340        |
| <i>Procyon lotor</i>            | FMNH | 1.793          | 6351         | 3,803        | 355        | 2,550        |
| <i>Procyon lotor</i>            | FMNH | 1.794          | 6711         | 3,827        | 248        | 2,394        |
| <i>Procyon lotor</i>            | FMNH | 1.736          | 5065         | 3,705        | 188        | 2,274        |
| <i>Procyon lotor</i>            | FMNH | 1.795          | 5913         | 3,772        | 228        | 2,358        |
| <b>Procyon lotor</b>            |      | <b>average</b> | <b>6195</b>  | <b>3,792</b> | <b>248</b> | <b>2,394</b> |
| <i>Nasua nasua</i>              | FMNH | 1.687          | 6465         | 3,811        | 290        | 2,462        |
| <b>Mustelidae</b>               |      |                |              |              |            |              |
| <i>Mustela erminea</i>          | FMNH | 2706           | 786          | 2,895        | 49,2       | 1,692        |
| <i>Mustela erminea</i>          | FMNH | 4010           | 1052         | 3,022        | 50,1       | 1,700        |
| <i>Mustela erminea</i>          | HP   | HP             | 1010         | 3,004        | 54,9       | 1,740        |

|                                      |             |                |              |              |             |              |
|--------------------------------------|-------------|----------------|--------------|--------------|-------------|--------------|
| <b><i>Mustela erminea</i></b>        |             | <b>average</b> | <b>949</b>   | <b>2,977</b> | <b>51,4</b> | <b>1,711</b> |
| <i>Mustela nivalis</i>               | FMNH        | 9401           | 387          | 2,588        | 19,5        | 1,290        |
| <i>Mustela nivalis</i>               | FMNH        | 9402           | 416          | 2,619        | 18,4        | 1,265        |
| <i>Mustela nivalis</i>               | FMNH        | 9411           | 491          | 2,691        | 23,8        | 1,377        |
| <b><i>Mustela nivalis</i></b>        |             | <b>average</b> | <b>431</b>   | <b>2,634</b> | <b>20,6</b> | <b>1,314</b> |
| <i>Mustela vison</i>                 | FMNH        | 33.987         | 1790         | 3,253        | 57,3        | 1,758        |
| <i>Mustela vison</i>                 | FMNH        | 33.999         | 2534         | 3,404        | 76,5        | 1,884        |
| <i>Mustela vison</i>                 | FMNH        | 33.998         | 2330         | 3,367        | 73,9        | 1,869        |
| <i>Mustela vison</i>                 | HP          | I HP           | 2163         | 3,335        | 75,6        | 1,879        |
| <i>Mustela vison</i>                 | HP          | II HP          | 2620         | 3,418        | 64,8        | 1,812        |
| <b><i>Mustela vison</i></b>          |             | <b>average</b> | <b>2287</b>  | <b>3,359</b> | <b>69,6</b> | <b>1,843</b> |
| <i>Martes martes</i>                 | FMNH        | 39.423         | 2805         | 3,448        | 172         | 2,236        |
| <i>Martes martes</i>                 | FMNH        | 39.458         | 2787         | 3,445        | 173         | 2,238        |
| <i>Martes martes</i>                 | FMNH        | 31.539         | 2575         | 3,411        | 166         | 2,220        |
| <i>Martes martes</i>                 | FMNH        | 31.540         | 2801         | 3,447        | 151         | 2,179        |
| <i>Martes martes</i>                 | FMNH        | 1469           | 3761         | 3,575        | 193         | 2,286        |
| <i>Martes martes</i>                 | FMNH        | 1478           | 3541         | 3,549        | 184         | 2,265        |
| <i>Martes martes</i>                 | FMNH        | 1458           | 3701         | 3,568        | 181         | 2,258        |
| <i>Martes martes</i>                 | FMNH        | 1474           | 3687         | 3,567        | 182         | 2,260        |
| <i>Martes martes</i>                 | FMNH        | 1473           | 3574         | 3,553        | 176         | 2,246        |
| <i>Martes martes</i>                 | HP          | I HP           | 3392         | 3,530        | 220         | 2,342        |
| <i>Martes martes</i>                 | HP          | II HP          | 2365         | 3,374        | 184         | 2,265        |
| <b><i>Martes martes</i></b>          |             | <b>average</b> | <b>3181</b>  | <b>3,503</b> | <b>180</b>  | <b>2,255</b> |
| <b><i>Gulo gulo</i></b>              | <b>FMNH</b> | <b>6396</b>    | <b>11268</b> | <b>4,052</b> | <b>350</b>  | <b>2,544</b> |
| <b><i>Taxidea taxus</i></b>          | <b>FMNH</b> | <b>1569</b>    | <b>10623</b> | <b>4,026</b> | <b>388</b>  | <b>2,589</b> |
| <b><i>Meles meles</i></b>            | <b>FMNH</b> | <b>4934</b>    | <b>7674</b>  | <b>3,885</b> | <b>360</b>  | <b>2,556</b> |
| <i>Lutra lutra</i>                   | FMNH        | 3934           | 6278         | 3,798        | 117         | 2,068        |
| <i>Lutra lutra</i>                   | FMNH        | 31.493         | 7180         | 3,856        | 102         | 2,009        |
| <b><i>Lutra lutra</i></b>            |             | <b>average</b> | <b>6729</b>  | <b>3,828</b> | <b>110</b>  | <b>2,041</b> |
| <b><i>Enhydra lutris</i></b>         | <b>FMNH</b> | <b>992</b>     | <b>13479</b> | <b>4,130</b> | <b>272</b>  | <b>2,435</b> |
| <b>Mephitidae</b>                    |             |                |              |              |             |              |
| <i>Mephitis mephitis</i>             | FMNH        | 1.528          | 3196         | 3,505        | 255         | 2,407        |
| <i>Mephitis mephitis</i>             | FMNH        | 157/1976       | 2864         | 3,457        | 238         | 2,377        |
| <i>Mephitis mephitis</i>             | FMNH        | 1799           | 2386         | 3,378        | 211         | 2,324        |
| <b><i>Mephitis mephitis</i></b>      |             | <b>average</b> | <b>2815</b>  | <b>3,449</b> | <b>235</b>  | <b>2,371</b> |
| <b>Otariidae</b>                     |             |                |              |              |             |              |
| <i>Callorhinus ursinus</i>           | FMNH        | 288            | 19176        | 4,283        | 536         | 2,729        |
| <i>Callorhinus ursinus</i>           | FMNH        | 260            | 37722        | 4,577        | 476         | 2,678        |
| <b><i>Callorhinus ursinus</i></b>    |             | <b>average</b> | <b>28449</b> | <b>4,454</b> | <b>506</b>  | <b>2,704</b> |
| <i>Zalophus californianus</i>        | FMNH        | 1.732          | 26402        | 4,422        | 448         | 2,651        |
| <i>Zalophus californianus</i>        | FMNH        | 35/1976        | 24524        | 4,390        | 646         | 2,810        |
| <b><i>Zalophus californianus</i></b> |             | <b>average</b> | <b>25463</b> | <b>4,406</b> | <b>547</b>  | <b>2,738</b> |
| <b>Phocidae</b>                      |             |                |              |              |             |              |
| <b><i>Cystophora cristata</i></b>    | <b>FMNH</b> | <b>254</b>     | <b>39780</b> | <b>4,600</b> | <b>508</b>  | <b>2,706</b> |
| <b><i>Halichoerus grypus</i></b>     | <b>FMNH</b> | <b>2311</b>    | <b>27086</b> | <b>4,433</b> | <b>402</b>  | <b>2,604</b> |
| <i>Phoca hispida</i>                 | FMNH        | 2284           | 17005        | 4,231        | 124         | 2,093        |
| <i>Phoca hispida</i>                 | FMNH        | 2289           | 16108        | 4,207        | 195         | 2,290        |
| <b><i>Phoca hispida</i></b>          |             | <b>average</b> | <b>16557</b> | <b>4,219</b> | <b>159</b>  | <b>2,201</b> |
| <b>Herpestidae</b>                   |             |                |              |              |             |              |
| <b><i>Ichneumia albicauda</i></b>    | <b>FMNH</b> | <b>1.636</b>   | <b>3488</b>  | <b>3,543</b> | <b>212</b>  | <b>2,326</b> |
| <b>Felidae</b>                       |             |                |              |              |             |              |

|                                    |      |                |              |              |             |              |
|------------------------------------|------|----------------|--------------|--------------|-------------|--------------|
| <i>Felis silvestris</i>            | FMNH | 1.780          | 4055         | 3,608        | 120         | 2,079        |
| <i>Felis catus</i>                 | FMNH | 18.263         | 4344         | 3,638        | 100         | 2,000        |
| <i>Felis catus</i>                 | FMNH | 1065/1961      | 3749         | 3,574        | 79          | 1,898        |
| <b><i>Felis catus</i></b>          |      | <b>average</b> | <b>4047</b>  | <b>3,607</b> | <b>89,5</b> | <b>1,952</b> |
| <i>Lynx lynx</i>                   | FMNH | 39.735         | 8031         | 3,905        | 201         | 2,303        |
| <i>Lynx lynx</i>                   | FMNH | 31.929         | 8161         | 3,912        | 217         | 2,336        |
| <i>Lynx lynx</i>                   | FMNH | 39.386         | 9015         | 3,955        | 137         | 2,137        |
| <i>Lynx lynx</i>                   | FMNH | 6749           | 9857         | 3,994        | 222         | 2,346        |
| <b><i>Lynx lynx</i></b>            |      | <b>average</b> | <b>8766</b>  | <b>3,943</b> | <b>194</b>  | <b>2,288</b> |
| <i>Leptailurus serval</i>          | FMNH | 1.361          | 6097         | 3,785        | 180         | 2,255        |
| <i>Prionailurus viverrinus</i>     | FMNH | 243            | 4899         | 3,690        | 60,3        | 1,780        |
| <i>Puma concolor</i>               | FMNH | 1007           | 15250        | 4,183        | 347         | 2,540        |
| <i>Acinonyx jubatus</i>            | FMNH | 1102           | 11424        | 4,058        | 133         | 2,124        |
| <i>Acinonyx jubatus</i>            | FMNH | 31             | 11408        | 4,057        | 177         | 2,248        |
| <i>Acinonyx jubatus</i>            | FMNH | 14/1960        | 11418        | 4,058        | 157         | 2,196        |
| <b><i>Acinonyx jubatus</i></b>     |      | <b>average</b> | <b>11417</b> | <b>4,059</b> | <b>156</b>  | <b>2,193</b> |
| <i>Uncia uncia</i>                 | FMNH | 356/1561       | 14434        | 4,159        | 239         | 2,378        |
| <i>Uncia uncia</i>                 | FMNH | 1.833          | 14486        | 4,161        | 256         | 2,408        |
| <b><i>Uncia uncia</i></b>          |      | <b>average</b> | <b>16660</b> | <b>4,160</b> | <b>248</b>  | <b>2,394</b> |
| <i>Panthera leo</i>                | FMNH | 1.788          | 32176        | 4,508        | 644         | 2,809        |
| <i>Panthera leo</i>                | FMNH | 1.787          | 37604        | 4,575        | 604         | 2,781        |
| <b><i>Panthera leo</i></b>         |      | <b>average</b> | <b>34890</b> | <b>4,543</b> | <b>624</b>  | <b>2,795</b> |
| <b>TUBULIDENTATA</b>               |      |                |              |              |             |              |
| <b>Orycteropidae</b>               |      |                |              |              |             |              |
| <i>Orycteropus afer</i>            | FMNH | 1712           | 15922        | 4,202        | 1760        | 3,246        |
| <b>SIRENIA</b>                     |      |                |              |              |             |              |
| <b>Dugongidae</b>                  |      |                |              |              |             |              |
| <i>Dugong dugon</i>                | FMNH | 931/1960       | 51570        | 4,712        | 158         | 2,199        |
| <b>PROBOSCIDEA</b>                 |      |                |              |              |             |              |
| <b>Elephantidae</b>                |      |                |              |              |             |              |
| <i>Elephas maximus</i>             | SMNH | A600572        | 306160       | 5,486        | 4840        | 3,685        |
| <b>PERISSODACTYLA</b>              |      |                |              |              |             |              |
| <b>Equidae</b>                     |      |                |              |              |             |              |
| <i>Equus burchelli</i>             | FMNH | 2.021          | 70447        | 4,848        | 1408        | 3,149        |
| <b>Tapiridae</b>                   |      |                |              |              |             |              |
| <i>Tapirus terrestris</i>          | FMNH | 852/1969       | 37856        | 4,578        | 1442        | 3,159        |
| <b>Rhinocerotidae</b>              |      |                |              |              |             |              |
| <i>Diceros bicornis</i>            | FMNH | 647/1960       | 94392        | 4,975        | 2120        | 3,326        |
| <b>ARTIODACTYLA</b>                |      |                |              |              |             |              |
| <b>Suidae</b>                      |      |                |              |              |             |              |
| <i>Sus scrofa</i>                  | FMNH | 2074           | 58144        | 4,765        | 1940        | 3,288        |
| <i>Babryrousa babyrussa</i>        | FMNH | 501/1960       | 34666        | 4,540        | 928         | 2,968        |
| <i>Babryrousa babyrussa</i>        | FMNH | 502/1960       | 34116        | 4,507        | 824         | 2,916        |
| <b><i>Babryrousa babyrussa</i></b> |      | <b>average</b> | <b>34391</b> | <b>4,536</b> | <b>876</b>  | <b>2,943</b> |
| <b>Hippopotamidae</b>              |      |                |              |              |             |              |
| <i>Hippopotamus amphibius</i>      | FMNH | 704/1960       | 187050       | 5,272        | 1940        | 3,288        |
| <b>Camelidae</b>                   |      |                |              |              |             |              |
| <i>Lama guanicoe</i>               | FMNH | 180/1960       | 34275        | 4,535        | 440         | 2,643        |
| <i>Lama guanicoe</i>               | FMNH | 1478           | 27078        | 4,433        | 428         | 2,631        |
| <b><i>Lama guanicoe</i></b>        |      | <b>average</b> | <b>30677</b> | <b>4,487</b> | <b>434</b>  | <b>2,637</b> |
| <b>Moschidae</b>                   |      |                |              |              |             |              |

|                                        |             |                 |              |              |             |              |
|----------------------------------------|-------------|-----------------|--------------|--------------|-------------|--------------|
| <i>Moschus moschiferus</i>             | FMNH        | 163             | 6178         | 3,791        | 316         | 2,500        |
| <i>Moschus moschiferus</i>             | FMNH        | 158             | 6575         | 3,818        | 358         | 2,554        |
| <b><i>Moschus moschiferus</i></b>      |             | <b>average</b>  | <b>6377</b>  | <b>3,805</b> | <b>337</b>  | <b>2,528</b> |
| <b>Cervidae</b>                        |             |                 |              |              |             |              |
| <b><i>Muntiacus muntjak</i></b>        | <b>FMNH</b> | <b>151</b>      | <b>11279</b> | <b>4,052</b> | <b>470</b>  | <b>2,672</b> |
| <i>Alces alces</i>                     | FMNH        | I HP            | 76700        | 4,885        | 1186        | 3,074        |
| <i>Alces alces</i>                     | FMNH        | II HP           | 75796        | 4,880        | 1388        | 3,142        |
| <b><i>Alces alces</i></b>              |             | <b>average</b>  | <b>76248</b> | <b>4,882</b> | <b>1287</b> | <b>3,110</b> |
| <b><i>Rangifer tarandus</i></b>        | <b>FMNH</b> | <b>HP</b>       | <b>49362</b> | <b>4,693</b> | <b>1450</b> | <b>3,161</b> |
| <i>Odocoileus virginianus</i>          | FMNH        | I HP            | 28452        | 4,454        | 1118        | 3,048        |
| <i>Odocoileus virginianus</i>          | FMNH        | II HP           | 31610        | 4,500        | 1224        | 3,088        |
| <b><i>Odocoileus virginianus</i></b>   |             | <b>average</b>  | <b>30031</b> | <b>4,478</b> | <b>1171</b> | <b>3,069</b> |
| <b><i>Capreolus capreolus</i></b>      | <b>FMNH</b> | <b>1.779</b>    | <b>10391</b> | <b>4,017</b> | <b>588</b>  | <b>2,769</b> |
| <b>Antilocapridae</b>                  |             |                 |              |              |             |              |
| <b><i>Antilocapra americana</i></b>    | <b>FMNH</b> | <b>1.304</b>    | <b>21445</b> | <b>4,331</b> | <b>484</b>  | <b>2,685</b> |
| <b>Bovidae</b>                         |             |                 |              |              |             |              |
| <b><i>Tragelaphus strepsiceros</i></b> | <b>FMNH</b> | <b>HP</b>       | <b>55800</b> | <b>4,747</b> | <b>1082</b> | <b>3,034</b> |
| <b><i>Tragelaphus imberbis</i></b>     | <b>FMNH</b> | <b>929</b>      | <b>32733</b> | <b>4,515</b> | <b>1028</b> | <b>3,012</b> |
| <b><i>Boselaphus tragocamelus</i></b>  | <b>FMNH</b> | <b>1.610</b>    | <b>44791</b> | <b>4,651</b> | <b>1386</b> | <b>3,142</b> |
| <b><i>Sylvicapra grimmia</i></b>       | <b>FMNH</b> | <b>1092</b>     | <b>7154</b>  | <b>3,855</b> | <b>418</b>  | <b>2,621</b> |
| <b><i>Kobus leche</i></b>              | <b>FMNH</b> | <b>1100</b>     | <b>29213</b> | <b>4,466</b> | <b>568</b>  | <b>2,754</b> |
| <b><i>Damaliscus pygargus</i></b>      | <b>FMNH</b> | <b>1.357</b>    | <b>29924</b> | <b>4,476</b> | <b>784</b>  | <b>2,894</b> |
| <b><i>Oreotragus oreotragus</i></b>    | <b>FMNH</b> | <b>674</b>      | <b>6265</b>  | <b>3,797</b> | <b>226</b>  | <b>2,354</b> |
| <b><i>Ourebia ourebi</i></b>           | <b>FMNH</b> | <b>599/1960</b> | <b>8370</b>  | <b>3,923</b> | <b>360</b>  | <b>2,556</b> |
| <b><i>Madoqua kirki</i></b>            | <b>FMNH</b> | <b>672</b>      | <b>5048</b>  | <b>3,703</b> | <b>160</b>  | <b>2,204</b> |
| <b><i>Antilope cervicapra</i></b>      | <b>FMNH</b> | <b>1.805</b>    | <b>15798</b> | <b>4,199</b> | <b>490</b>  | <b>2,690</b> |
| <b><i>Gazella thomsonii</i></b>        | <b>FMNH</b> | <b>652</b>      | <b>12933</b> | <b>4,112</b> | <b>364</b>  | <b>2,561</b> |
| <b><i>Gazella subgutturosa</i></b>     | <b>FMNH</b> | <b>1020</b>     | <b>11706</b> | <b>4,068</b> | <b>376</b>  | <b>2,575</b> |
| <b><i>Rupicapra rupicapra</i></b>      | <b>FMNH</b> | <b>1394</b>     | <b>13242</b> | <b>4,122</b> | <b>456</b>  | <b>2,659</b> |
| <b><i>Ovis aries</i></b>               | <b>FMNH</b> | <b>HP</b>       | <b>17443</b> | <b>4,242</b> | <b>488</b>  | <b>2,688</b> |
| <i>Ovis dalli</i>                      | FMNH        | 1.445           | 21221        | 4,327        | 546         | 2,737        |
| <i>Ovis dalli</i>                      | FMNH        | 1.444           | 26306        | 4,420        | 600         | 2,778        |
| <b><i>Ovis dalli</i></b>               |             | <b>average</b>  | <b>23764</b> | <b>4,376</b> | <b>573</b>  | <b>2,758</b> |
| <b>PHOLIDOTA</b>                       |             |                 |              |              |             |              |
| <b>Manidae</b>                         |             |                 |              |              |             |              |
| <b><i>Manis javanica</i></b>           | <b>FMNH</b> | <b>834/1960</b> | <b>3654</b>  | <b>3,563</b> | <b>268</b>  | <b>2,428</b> |
| <b>RODENTIA</b>                        |             |                 |              |              |             |              |
| <b>Aplodontidae</b>                    |             |                 |              |              |             |              |
| <i>Aplodontia rufa</i>                 | FMNH        | 1.483           | 3165         | 3,500        | 25,7        | 1,410        |
| <i>Aplodontia rufa</i>                 | FMNH        | 1.485           | 3442         | 3,537        | 25,5        | 1,407        |
| <i>Aplodontia rufa</i>                 | FMNH        | 1001/1960       | 3265         | 3,514        | 28,5        | 1,455        |
| <b><i>Aplodontia rufa</i></b>          |             | <b>average</b>  | <b>3291</b>  | <b>3,517</b> | <b>26,6</b> | <b>1,425</b> |
| <b>Sciuridae</b>                       |             |                 |              |              |             |              |
| <b><i>Spermophilus fulvus</i></b>      | <b>FMNH</b> | <b>863</b>      | <b>1425</b>  | <b>3,154</b> | <b>19,8</b> | <b>1,297</b> |
| <i>Sciurus vulgaris</i>                | FMNH        | 5506            | 1056         | 3,024        | 47,9        | 1,680        |
| <i>Sciurus vulgaris</i>                | FMNH        | 6596            | 1088         | 3,037        | 57,7        | 1,761        |
| <b><i>Sciurus vulgaris</i></b>         |             | <b>average</b>  | <b>1072</b>  | <b>3,030</b> | <b>52,8</b> | <b>1,723</b> |
| <b><i>Sciurus griseus</i></b>          | <b>FMNH</b> | <b>1.534</b>    | <b>1795</b>  | <b>3,254</b> | <b>84,9</b> | <b>1,929</b> |
| <b><i>Pteromys volans</i></b>          | <b>FMNH</b> | <b>34.373</b>   | <b>715</b>   | <b>2,854</b> | <b>15</b>   | <b>1,176</b> |
| <b>Castoridae</b>                      |             |                 |              |              |             |              |
| <i>Castor fiber</i>                    | FMNH        | 39.447          | 6642         | 3,822        | 152         | 2,182        |

|                                       |             |                |             |              |             |              |
|---------------------------------------|-------------|----------------|-------------|--------------|-------------|--------------|
| <i>Castor fiber</i>                   | FMNH        | 39.698         | 8043        | 3,905        | 130         | 2,114        |
| <i>Castor fiber</i>                   | FMNH        | 33.944         | 8363        | 3,922        | 136         | 2,134        |
| <b><i>Castor fiber</i></b>            |             | <b>average</b> | <b>7683</b> | <b>3,886</b> | <b>139</b>  | <b>2,143</b> |
| <b>Geomyidae</b>                      |             |                |             |              |             |              |
| <b><i>Geomys bursarius</i></b>        | <b>FMNH</b> | <b>1.486</b>   | <b>1059</b> | <b>3,025</b> | <b>15,6</b> | <b>1,193</b> |
| <b>Heteromyidae</b>                   |             |                |             |              |             |              |
| <i>Dipodomys ordii</i>                | FMNH        | 1.491          | 781         | 2,893        | 28,1        | 1,449        |
| <i>Dipodomys ordii</i>                | FMNH        | 1.492          | 778         | 2,891        | 33          | 1,519        |
| <b><i>Dipodomys ordii</i></b>         |             | <b>average</b> | <b>780</b>  | <b>2,892</b> | <b>30,6</b> | <b>1,486</b> |
| <b>Muridae</b>                        |             |                |             |              |             |              |
| <b><i>Neotoma floridana</i></b>       | <b>FMNH</b> | <b>1520</b>    | <b>772</b>  | <b>2,888</b> | <b>21,6</b> | <b>1,334</b> |
| <i>Peromyscus maniculatus</i>         | FMNH        | 1.514          | 262         | 2,418        | 13          | 1,114        |
| <i>Peromyscus maniculatus</i>         | FMNH        | 1.516          | 283         | 2,452        | 13,3        | 1,124        |
| <b><i>Peromyscus maniculatus</i></b>  |             | <b>average</b> | <b>273</b>  | <b>2,436</b> | <b>13,2</b> | <b>1,121</b> |
| <i>Sigmodon hispidus</i>              | FMNH        | 1.524          | 652         | 2,814        | 19,3        | 1,286        |
| <i>Sigmodon hispidus</i>              | FMNH        | 1.527          | 505         | 2,703        | 12,8        | 1,107        |
| <b><i>Sigmodon hispidus</i></b>       |             | <b>average</b> | <b>579</b>  | <b>2,763</b> | <b>16,1</b> | <b>1,207</b> |
| <i>Clethrionomys glareolus</i>        | FMNH        | 38.641         | 250         | 2,398        | 9,1         | 0,959        |
| <i>Clethrionomys glareolus</i>        | FMNH        | 38.618         | 253         | 2,403        | 10,6        | 1,025        |
| <i>Clethrionomys glareolus</i>        | FMNH        | 38.609         | 262         | 2,418        | 9,7         | 0,987        |
| <i>Clethrionomys glareolus</i>        | FMNH        | 38.616         | 246         | 2,391        | 8,85        | 0,947        |
| <i>Clethrionomys glareolus</i>        | FMNH        | 38.642         | 242         | 2,384        | 9,4         | 0,973        |
| <i>Clethrionomys glareolus</i>        | FMNH        | 38.615         | 257         | 2,410        | 9,9         | 0,996        |
| <i>Clethrionomys glareolus</i>        | FMNH        | 38.644         | 233         | 2,367        | 7,55        | 0,878        |
| <i>Clethrionomys glareolus</i>        | FMNH        | 38.637         | 268         | 2,428        | 8,5         | 0,929        |
| <i>Clethrionomys glareolus</i>        | FMNH        | 38.629         | 254         | 2,405        | 9           | 0,954        |
| <i>Clethrionomys glareolus</i>        | FMNH        | 38.630         | 258         | 2,412        | 8,4         | 0,924        |
| <i>Clethrionomys glareolus</i>        | FMNH        | 38.635         | 249         | 2,396        | 8,75        | 0,942        |
| <i>Clethrionomys glareolus</i>        | FMNH        | 38.628         | 243         | 2,386        | 9,1         | 0,959        |
| <i>Clethrionomys glareolus</i>        | HP          | HP             | 249         | 2,396        | 9,95        | 0,998        |
| <b><i>Clethrionomys glareolus</i></b> |             | <b>average</b> | <b>251</b>  | <b>2,400</b> | <b>9,14</b> | <b>0,961</b> |
| <i>Arvicola terrestris</i>            | FMNH        | 6279           | 625         | 2,796        | 14,4        | 1,158        |
| <i>Arvicola terrestris</i>            | FMNH        | 5332           | 673         | 2,828        | 13,3        | 1,124        |
| <b><i>Arvicola terrestris</i></b>     |             | <b>average</b> | <b>649</b>  | <b>2,812</b> | <b>13,9</b> | <b>1,143</b> |
| <b><i>Microtus oeconomus</i></b>      |             | <b>7674</b>    | <b>311</b>  | <b>2,493</b> | <b>9</b>    | <b>0,954</b> |
| <i>Ondatra zibethica</i>              | FMNH        | 34.402         | 1846        | 3,266        | 22,6        | 1,354        |
| <i>Ondatra zibethica</i>              | FMNH        | 34.398         | 1734        | 3,239        | 27          | 1,431        |
| <i>Ondatra zibethica</i>              | FMNH        | 39.346         | 1756        | 3,245        | 18,5        | 1,267        |
| <i>Ondatra zibethica</i>              | FMNH        | 39.348         | 1491        | 3,173        | 20          | 1,301        |
| <i>Ondatra zibethica</i>              | FMNH        | 39.349         | 1674        | 3,224        | 25,3        | 1,403        |
| <i>Ondatra zibethica</i>              | FMNH        | 39.344         | 1580        | 3,199        | 28,7        | 1,458        |
| <i>Ondatra zibethica</i>              | FMNH        | 39.345         | 2009        | 3,303        | 30,4        | 1,483        |
| <b><i>Ondatra zibethica</i></b>       |             | <b>average</b> | <b>1727</b> | <b>3,237</b> | <b>24,6</b> | <b>1,391</b> |
| <i>Lemmus lemmus</i>                  | FMNH        | 8935           | 431         | 2,634        | 8,65        | 0,937        |
| <i>Lemmus lemmus</i>                  | FMNH        | 9021           | 468         | 2,670        | 9           | 0,954        |
| <b><i>Lemmus lemmus</i></b>           |             | <b>average</b> | <b>450</b>  | <b>2,653</b> | <b>8,83</b> | <b>0,946</b> |
| <i>Apodemus flavicollis</i>           | FMNH        | 13.270         | 266         | 2,425        | 8           | 0,903        |
| <i>Apodemus flavicollis</i>           | FMNH        | 5336           | 327         | 2,515        | 8,8         | 0,944        |
| <b><i>Apodemus flavicollis</i></b>    |             | <b>average</b> | <b>297</b>  | <b>2,473</b> | <b>8,4</b>  | <b>0,924</b> |
| <i>Rattus norvegicus</i>              | FMNH        | 5086           | 671         | 2,827        | 19,6        | 1,292        |
| <i>Rattus norvegicus</i>              | FMNH        | 31.803         | 722         | 2,859        | 22,5        | 1,352        |



|                                     |             |                  |             |              |             |              |
|-------------------------------------|-------------|------------------|-------------|--------------|-------------|--------------|
| <b><i>Rattus norvegicus</i></b>     |             | <b>average</b>   | <b>697</b>  | <b>2,843</b> | <b>21,1</b> | <b>1,324</b> |
| <i>Mus musculus</i>                 | FMNH        | 21.470           | 177         | 2,248        | 7,9         | 0,898        |
| <i>Mus musculus</i>                 | FMNH        | 6513             | 198         | 2,297        | 8           | 0,903        |
| <b><i>Mus musculus</i></b>          |             | <b>average</b>   | <b>188</b>  | <b>2,274</b> | <b>7,95</b> | <b>0,900</b> |
| <b>Gliridae</b>                     |             |                  |             |              |             |              |
| <b><i>Glis glis</i></b>             | <b>FMNH</b> | <b>713</b>       | <b>594</b>  | <b>2,774</b> | <b>14,6</b> | <b>1,164</b> |
| <b><i>Eliomys quercinus</i></b>     | <b>FMNH</b> | <b>6731</b>      | <b>534</b>  | <b>2,728</b> | <b>16,5</b> | <b>1,217</b> |
| <b>Erethizontidae</b>               |             |                  |             |              |             |              |
| <b><i>Erethizon dorsatum</i></b>    | <b>FMNH</b> | <b>1.565</b>     | <b>3874</b> | <b>3,588</b> | <b>152</b>  | <b>2,182</b> |
| <b>Chinchillidae</b>                |             |                  |             |              |             |              |
| <b><i>Chinchilla lanigera</i></b>   | <b>FMNH</b> | <b>no3/1976</b>  | <b>1691</b> | <b>3,228</b> | <b>23,3</b> | <b>1,367</b> |
| <b>Caviidae</b>                     |             |                  |             |              |             |              |
| <b><i>Cavia porcellus</i></b>       | <b>FMNH</b> | <b>898a/1960</b> | <b>1252</b> | <b>3,098</b> | <b>22,8</b> | <b>1,358</b> |
| <b>Agoutidae</b>                    |             |                  |             |              |             |              |
| <b><i>Agouti paca</i></b>           | <b>FMNH</b> | <b>199/1960</b>  | <b>7325</b> | <b>3,865</b> | <b>282</b>  | <b>2,450</b> |
| <b>Myocastoridae</b>                |             |                  |             |              |             |              |
| <i>Myocastor coypus</i>             | FMNH        | 1.999            | 5208        | 3,717        | 80          | 1,903        |
| <i>Myocastor coypus</i>             | FMNH        | 688/1960         | 4955        | 3,695        | 74          | 1,869        |
| <b><i>Myocastor coypus</i></b>      |             | <b>average</b>   | <b>5082</b> | <b>3,706</b> | <b>77</b>   | <b>1,886</b> |
| <b>LAGOMORPHA</b>                   |             |                  |             |              |             |              |
| <b>Leporidae</b>                    |             |                  |             |              |             |              |
| <i>Oryctolagus cuniculus</i>        | FMNH        | 1024/1961        | 2679        | 3,428        | 58          | 1,763        |
| <i>Oryctolagus cuniculus</i>        | FMNH        | 1034/1961        | 3078        | 3,488        | 78          | 1,892        |
| <b><i>Oryctolagus cuniculus</i></b> |             | <b>average</b>   | <b>2879</b> | <b>3,459</b> | <b>68</b>   | <b>1,833</b> |
| <b><i>Lepus europaeus</i></b>       | <b>FMNH</b> | <b>34.442</b>    | <b>3404</b> | <b>3,532</b> | <b>90,5</b> | <b>1,957</b> |

Taxonomical affinities, physical location, catalogue numbers, skull and endocast measurements of the material. Species averages in bold.

Abbreviations:

FMNH = Finnish Museum of Natural History, Helsinki

SMNH = Swedish Museum of Natural History, Stockholm

AUHU = Institute of Biomedicine, Anatomy Unit, Helsinki University

MF = private collection of Mikael Fortelius

HP = private collection of Henry Pihlström
